# Supplementary material
Source: PubMed Central journal article supplement (PMC9971675)
Supplement: 12274_2022_5354_MOESM1_ESM.pdf [file 12274_2022_5354_MOESM1_ESM.pdf]

# Electronic Supplementary Material

## Ultrasensitive and point-of-care detection of plasma phosphorylated tau in Alzheimer's disease using colorimetric and surface-enhanced Raman scattering dual-readout lateral flow assay

Liding Zhang<sup>1,2,§</sup>, Ying Su<sup>3,§</sup>, Xiaohan Liang<sup>1,2</sup>, Kai Cao<sup>1,2</sup>, Qingming Luo<sup>4,5</sup>, and Haiming Luo<sup>1,2,5</sup> (✉)

<sup>1</sup> Britton Chance Center for Biomedical Photonics, Wuhan National Laboratory for Optoelectronics, Huazhong University of Science and Technology (HUST), Wuhan 430074, China

<sup>2</sup> MoE Key Laboratory for Biomedical Photonics, School of Engineering Sciences, Huazhong University of Science and Technology, Wuhan 430074, China

<sup>3</sup> Department of Neurology, Union Hospital, Tongji Medical College, Huazhong University of Science and Technology, Wuhan 430074, China

<sup>4</sup> Key Laboratory of Biomedical Engineering of Hainan Province, School of Biomedical Engineering, Hainan University, Haikou 570228, China

<sup>5</sup> Research Unit of Multimodal Cross Scale Neural Signal Detection and Imaging, Chinese Academy of Medical Sciences, HUST-Suzhou Institute for Brainmatics, Jiangsu Industrial Technology Research Institute (JITRI), Suzhou 215123, China

<sup>§</sup> Liding Zhang and Ying Su contributed equally to this work.

Supporting information to <https://doi.org/10.1007/s12274-022-5354-4>

### Supplementary figures

**Figure S1** Characterization of AuNPs.

**Figure S2** Antibody modification of 4-MBA@AuNP probe.

**Figure S3** The Raman spectra and intensity of 4-MBA@AuNP-3G5 at different volumes of 1 mM 4-MBA.

**Figure S4** OD<sub>525</sub> value and absorption spectrum of 4-MBA@AuNP-3G5 conjugates loading at different volumes of 0.1 M K<sub>2</sub>CO<sub>3</sub>.

**Figure S5** OD<sub>525</sub> value and absorption spectrum of 4-MBA@AuNP loading at different concentrations of 3G5.

**Figure S6** OD<sub>525</sub> value and absorption spectrum of 4-MBA@AuNP-3G5 conjugates loading at different concentrations of NaCl.

**Figure S7** The log-linear curve of T-line color and SERS intensity versus different p-tau<sup>396,404</sup> concentrations.

**Figure S8** The comparison of colorimetric-based LFA test results and the diagnosis results.

**Figure S9** Raman intensities and antibody activity of 4-MBA@AuNP-3G5 before and after storage.

**Figure S10** Colorimetric intensity of dual-readout LFA detecting different concentrations of p-tau<sup>396,404</sup> protein.

### Supplementary Tables

**Table S1** Sequence of synthesized peptides used in this study

**Table S2** Information of the participants in this study

**Table S3** Information of antibodies used in this study

Supplementary figures

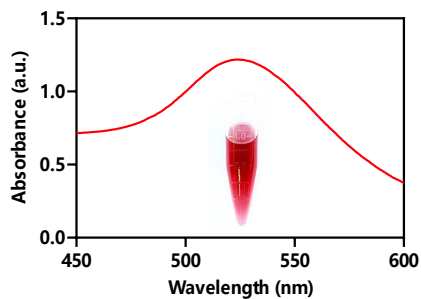

Fig. S1 The color and UV-Vis absorption spectra of AuNPs.

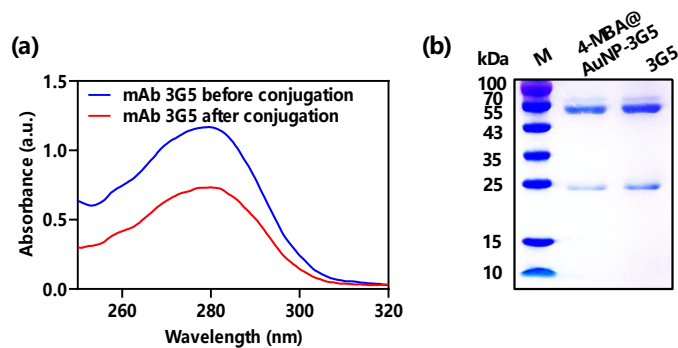

Fig. S2 (a) The UV-Vis absorption spectra of supernatant liquor (3G5) before and after conjugation. (b) Reduced SDS-PAGE analysis of the 4-MBA@AuNP-3G5.

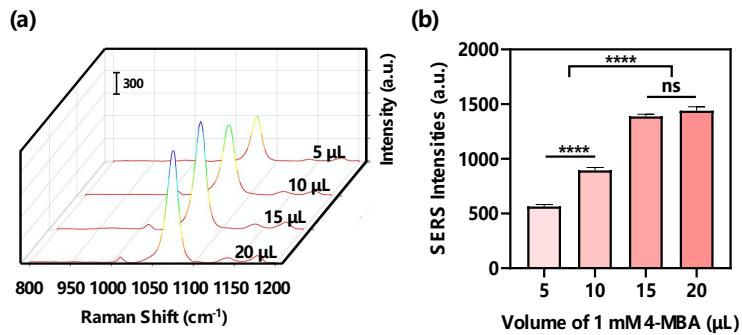

Fig. S3 The Raman spectra (a) and intensity (b) of 4-MBA@AuNP-3G5 at different volumes of 1 mM 4-MBA. Data are presented as means  $\pm$  SD,  $n = 3$ . Statistical significance is indicated in figures by \*\*\*\*  $p < 0.0001$  and ns (indicating no significance).

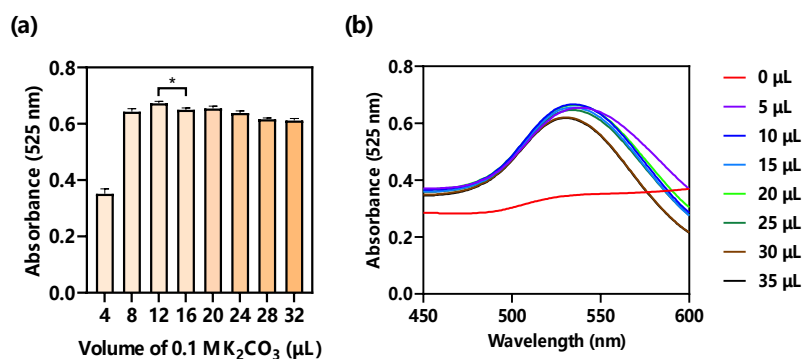

**Fig. S4** OD<sub>525</sub> value (a) and absorption spectrum (b) of 4-MBA@AuNP-3G5 conjugates loading at different volumes of 0.1 M K<sub>2</sub>CO<sub>3</sub>. Data are presented as means ± SD, n = 3. Statistical significance is indicated in the figures by \**p* < 0.05.

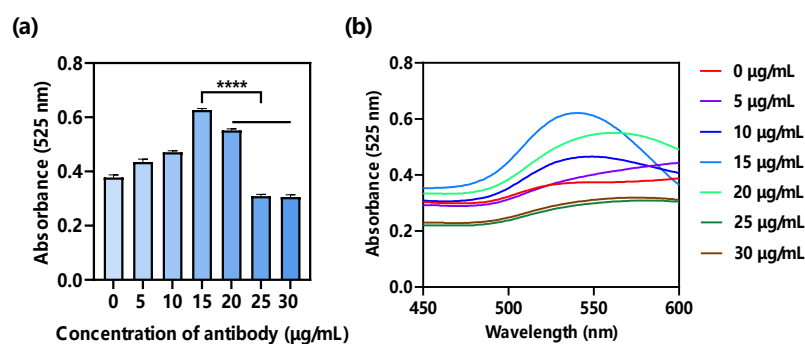

**Fig. S5** OD<sub>525</sub> value (a) and absorption spectrum (b) of 4-MBA@AuNP loading different concentrations of 3G5. Data are presented as means ± SD, n = 3. Statistical significance is indicated in figures by \*\*\*\**p* < 0.0001.

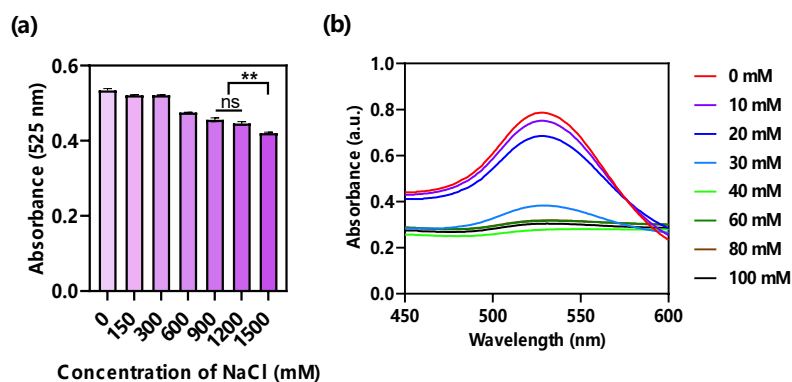

**Fig. S6** OD<sub>525</sub> value (a) and absorption spectrum (b) of 4-MBA@AuNP-3G5 conjugates loading at different concentrations of NaCl. Data are presented as means ± SD, n = 3. Statistical significance is indicated in figures by \*\**p* < 0.01 and ns (indicating no significance).

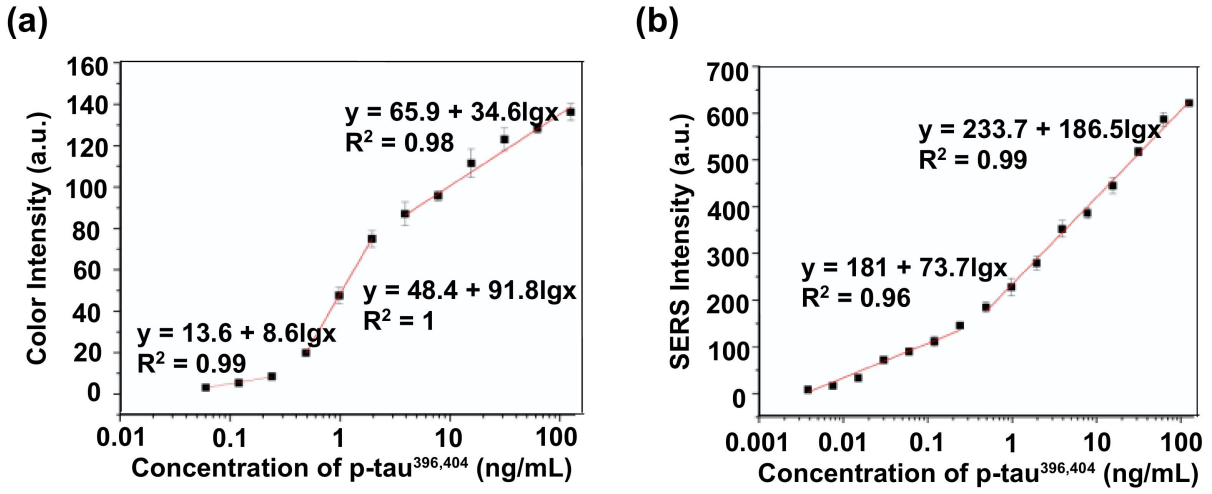

Fig. S7 (a) The linear curve of T-line color intensity versus p-tau<sup>396,404</sup> concentrations ranging from 60 pg/mL to 125 ng/mL. (b) The linear curve of SERS intensity on the T-line versus p-tau<sup>396,404</sup> concentration ranged from 3.8 pg/mL to 125 ng/mL.

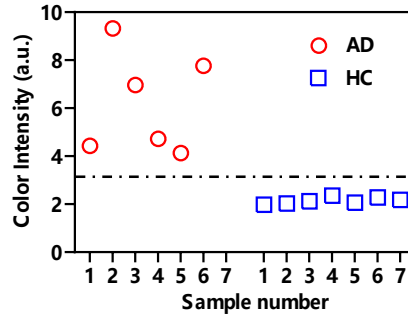

Fig. S8 The comparison of colorimetric-based LFA test results and the diagnosis results.

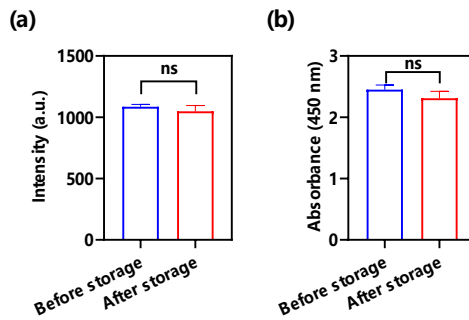

Fig. S9 Raman intensities (a) and antibody activity (b) of 4-MBA@AuNP-3G5 before and after storage. Data are presented as means  $\pm$  SD, n = 3.

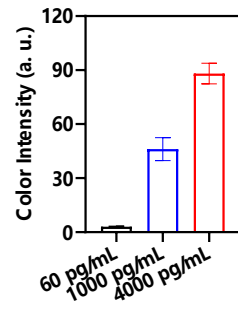

Fig. S10 Colorimetric intensity of dual-readout LFA detecting different concentrations of p-tau<sup>396,404</sup> protein. Data are presented as means  $\pm$  SD, n = 3.

## Supplementary Tables

**Table S1** The sequence of synthesized peptides used in this study

|                           |                                              |
|---------------------------|----------------------------------------------|
| p-tau <sup>396,404</sup>  | RENAKAKTDHGAEIVYK[Ser(P)]PVVSGDT[Ser(P)]PRHL |
| p-tau <sup>396</sup>      | TDHGAEIVYK[Ser(P)]PVVSGDTSRHL                |
| p-tau <sup>404</sup>      | TDHGAEIVYKSPVVSGDT[Ser(P)]PRHL               |
| p-tau <sup>231</sup>      | CKKVAVVR[Thr(P)]PPKSPSSAK                    |
| np-tau <sup>231</sup>     | KVAVVRTPPKSPS                                |
| np-tau <sup>396</sup>     | TDHGAEIVYKSPVVSGDTSRHL                       |
| np-tau <sup>404</sup>     | TDHGAEIVYKSPVVSGDTSRHL                       |
| np-tau <sup>396,404</sup> | RENAKAKTDHGAEIVYKSPVVSGDTSRHL                |

**Table S2** Information of the participants in this study

| Participant | Sex | Age | Identification | Verification | MoCA score | p-tau <sup>181</sup><br>(pg/mL) | p-tau <sup>217</sup><br>(pg/mL) |
|-------------|-----|-----|----------------|--------------|------------|---------------------------------|---------------------------------|
| AD 9        | M   | 62  | AD             | AD           | 8          | 13.37                           | 32.83                           |
| AD 13       | M   | 61  | AD             | AD           | 2          | 20.65                           | 46.23                           |
| AD 7        | F   | 74  | AD             | AD           | 5          | 22.58                           | 34.84                           |
| AD 15       | F   | 54  | AD             | AD           | 5          | 16.90                           | 41.14                           |
| AD 16       | F   | 70  | AD             | AD           | 10         | 12.89                           | 47.22                           |
| AD 20       | F   | 60  | AD             | AD           | 6          | 14.55                           | 34.84                           |
| HC 1        | F   | 53  | HC             | HC           | 27         | 5.29                            | 7.71                            |
| HC 2        | F   | 57  | HC             | HC           | 28         | 4.46                            | 8.39                            |
| HC 3        | F   | 55  | HC             | HC           | 27         | 3.97                            | 5.84                            |
| HC 4        | F   | 75  | HC             | HC           | 28         | 6.28                            | 13.64                           |
| HC 5        | F   | 65  | HC             | HC           | 29         | 4.08                            | 9.14                            |
| HC 6        | F   | 64  | HC             | HC           | 28         | 4.19                            | 10.47                           |
| HC 7        | F   | 55  | HC             | HC           | 28         | 4.77                            | 12.48                           |

**Table S3** Information of antibodies used in this study

| mAb | Isotype              | IC50 Value | Titre           |
|-----|----------------------|------------|-----------------|
| 3G5 | IgG1, $\kappa$ chain | 49 nM      | 10 <sup>6</sup> |
| 4B1 | IgG2, $\kappa$ chain | 14 nM      | 10 <sup>6</sup> |
